# Supplementary material for: Physical Activity Plus Energy Restriction Prevents 4T1.2 Mammary Tumor Progression, MDSC Accumulation, and an Immunosuppressive Tumor Microenvironment
Source: Oxford University Press journal article supplement (doi:10.1158/1940-6207.capr-17-0233), 2019-07-02
Supplement: 19406207capr170233-sup-186965_3_supp_5591923_pt9gzs.docx [file 19406207capr170233-sup-186965_3_supp_5591923_pt9gzs.docx]

**Supplemental Table 2A. Comparison of the number of splenocytes and**

**splenic populations among the treatment groups at day 35 post-tumor implantation.**

| **A**  Day 35 | | | | | |
| --- | --- | --- | --- | --- | --- |
| Number (x106) | Weight Gain | | Weight Maintenance | | P-value |
| SED+AL  (n=18) | PA+AL  (n=20) | SED+ER  (n=15) | PA+ER  (n=20) |
| Splenocytes | 364.0 ± 220.3 | 358.7 ± 167.5 | 210.3 ± 168.0 | 184.2 ± 125.5*† | 0.002 |
| B cells (CD19+) | 179.8 ± 102.8 | 172.5 ± 85.1 | 102.7 ± 84.9† | 85.0 ± 60.8*† | 0.007 |
| Total T cells (CD3+) | 56.5 ± 33.5 | 60.4 ± 25.0 | 40.0 ± 23.1 | 40.7 ± 25.4 | 0.046 |
| Helper T cells (CD3+CD4+) | 33.5 ± 19.7 | 41.1 ± 18.2 | 24.5 ± 11.5† | 27.6 ± 18.0 | 0.028 |
| Cytolytic T cells (CD3+CD8+) | 14.6 ± 9.5 | 17.7 ± 8.0 | 13.2 ± 12.3 | 10.1 ± 5.4† | 0.034 |
| NK cells (NK1.1+) | 20.5 ± 13.2 | 20.1 ± 12.9 | 14.9 ± 15.9 | 11.5 ± 9.6† | 0.013 |
| Dendritic Cells (I-Ad+CD11c+) | 9.6 ± 6.2 | 8.2 ± 4.2 | 6.5 ± 6.0 | 6.0 ± 5.5 | 0.034 |
| Macrophages (I-Ad+CD11b+) | 21.7 ± 15.3 | 23.3 ± 13.5 | 14.2 ± 10.1 | 15.9 ± 11.8 | 0.093 |
| Macrophages (F4/80+) | 31.6 ± 24.7 | 32.8 ± 17.7 | 21.0 ± 28.9 | 20.3 ± 21.7 | 0.026 |

**Supplemental Table 2B. Comparison of the number of splenocytes and**

**splenic populations among the treatment groups when tumor volumes are equal in size.**

| **B** Tumor volume 0.05-0.20 cm3 | | | | | |
| --- | --- | --- | --- | --- | --- |
| Number (x106) | Weight Gain | | Weight Maintenance | | P-value |
| SED+AL  (n=7) | PA+AL  (n=7) | SED+ER  (n=7) | PA+ER  (n=7) |
| Splenocytes | 173.4 ± 44.4 | 207.4 ± 113.3 | 114.3 ± 54.7 | 125.0 ± 58.2 | 0.068 |
| B cells (CD19+) | 107.6 ± 27.0 | 93.4 ± 59.7 | 49.0 ± 18.2* | 78.6 ± 46.8 | 0.027 |
| Total T cells (CD3+) | 47.1 ± 11.0 | 39.5 ± 24.9 | 23.2 ± 8.2 | 33.0 ± 13.4 | 0.054 |
| Helper T cells (CD3+CD4+) | 21.4 ± 4.5 | 29.7 ± 18.7 | 15.0 ± 4.6 | 16.0 ± 6.4 | 0.052 |
| Cytolytic T cells (CD3+CD8+) | 13.7 ± 4.4 | 13.5 ± 6.4 | 7.9 ± 2.9 | 8.9 ± 3.0 | 0.038 |
| NK cells (NK1.1+) | 18.2 ± 8.9 | 13.4 ± 5.5 | 8.4 ± 4.3 | 16.0 ± 14.7 | 0.095 |
| Dendritic Cells (I-Ad+CD11c+) | 8.0 ± 3.6 | 5.3 ± 0.9 | 3.8 ± 2.4 | 6.5 ± 3.8 | 0.073 |
| Macrophages (I-Ad+CD11b+) | 21.7 ± 11.5 | 13.4 ± 4.7 | 10.3 ± 6.5 | 19.0 ± 9.5 | 0.073 |
| Macrophages (F4/80+) | 31.2 ± 11.8 | 27.3 ± 13.1 | 15.2 ± 13.6 | 27.8 ± 13.4 | 0.137 |

* designates significant difference from SED+AL group.

† designates significant difference from PA+AL group.
