# Supplementary material for: Physical Activity Plus Energy Restriction Prevents 4T1.2 Mammary Tumor Progression, MDSC Accumulation, and an Immunosuppressive Tumor Microenvironment
Source: Oxford University Press journal article supplement (doi:10.1158/1940-6207.capr-17-0233), 2019-07-02
Supplement: 19406207capr170233-sup-186965_3_supp_5591926_ptgxth.pdf [file 19406207capr170233-sup-186965_3_supp_5591926_ptgxth.pdf]

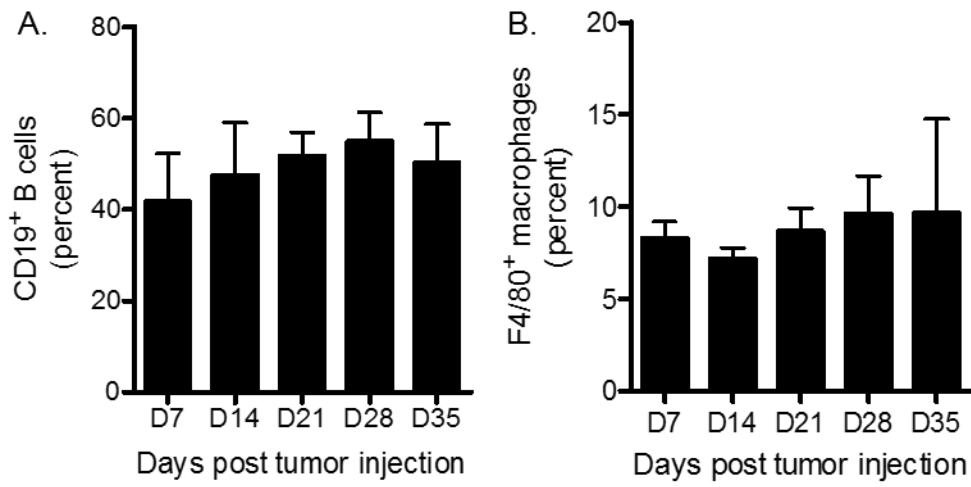

**Supplemental Figure 1. Splenic immune changes in the 4T1.2 model.** The percent of **(A)** CD19<sup>+</sup> B cells and **(B)** F480<sup>+</sup> macrophages over time.
